# Supplementary material
Source: PubMed Central journal article supplement (PMC7213535)
Supplement: NIHMS1579054-supplement-supporting_info_file.pdf [file NIHMS1579054-supplement-supporting_info_file.pdf]

**Glucose biosensor based on open-source wireless microfluidic potentiostat**

Conan Mercer,<sup>a\*</sup> Richard Bennett,<sup>a</sup> Peter Ó Conghaile,<sup>b</sup> James F. Rusling<sup>acde</sup> and Dónal Leech<sup>a</sup>

<sup>a</sup>School of Chemistry, National University of Ireland Galway, University Road, Galway, Ireland

<sup>b</sup>National Centre for Sensor Research, School of Chemical Sciences, Dublin City University, Dublin 9, Ireland

<sup>c</sup>Department of Chemistry, University of Connecticut, Storrs, CT 06269, USA

<sup>d</sup>Institute of Materials Science, University of Connecticut, Storrs, CT 06269, USA

<sup>e</sup>Department of Surgery, and Neag Cancer Center, UConn Health, Farmington, CT 06032, USA

\* Author to whom correspondence should be addressed,  
c.mercer1@nuigalway.ie

# 1 Hardware

## 1.1 ESP-32 Module Pin Definitions

The ESP-32 includes the ESP32 chip, built-in USB port, a hardware reset button, Wi-Fi antenna, Bluetooth, LED lights, and standard-sized GPIO (General Purpose Input Output) pins that are breadboard compatible. Figure 1 shows the ESP-32 module pin definitions.

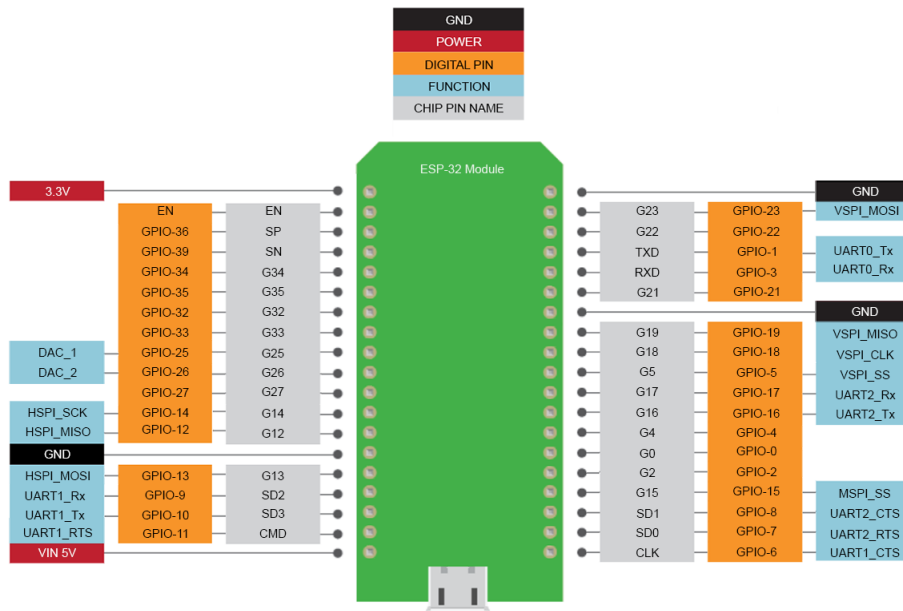

Figure 1: ESP-32 module pin definitions

## 1.2 ESP-32 Wireless Microcontroller Comparison

| Specifications | ESP-32[1]   | ESP-12E[2]  | Arduino[3]  | Teensy[4]   | Raspberry Pi[5] | BeagleBone[6] | RFDUINO[7]  |
|----------------|-------------|-------------|-------------|-------------|-----------------|---------------|-------------|
| Core count     | 2           | 1           | 1           | 1           | 4               | 2             | 1           |
| Architecture   | 32-Bit      | 32-Bit      | 8-Bit       | 32-Bit      | 64-Bit          | 32-Bit        | 32-Bit      |
| CPU frequency  | 160 MHz     | 80 MHz      | 16 MHz      | 72 MHz      | 1.4 GHz         | 1 GHz         | 16 MHz      |
| WiFi           | Yes         | Yes         | No          | No          | Yes             | No            | No          |
| Bluetooth      | Yes         | No          | No          | No          | Yes             | No            | Yes         |
| RAM            | 512KB       | 160KB       | 2KB         | 64KB        | 1GB             | 512MB         | 8KB         |
| Flash memory   | 16MB        | 16MB        | 32KB        | 2MB         | n/a             | 4GB           | 128KB       |
| GPIO pins      | 34          | 17          | 14          | 24          | 40              | 64            | 19          |
| ADC pins       | 18          | 1           | 6           | 2           | 0               | 1             | 1           |
| DAC pins       | 2           | 0           | 0           | 1           | 0               | 0             | 0           |
| Price (USD)    | 8.21        | 3.30        | 4.17        | 35.50       | 37.20           | 63.09         | 31.00       |
| Part Number    | 32799954012 | 32779189539 | 32810825676 | 32776625006 | 32838484861     | 1894139445    | 32837897544 |

Table 1: Specification comparison of two ESP Wi-Fi enabled microcontroller variants, compared to the Arduino UNO, Teensy 3.0, Raspberry Pi 3 Model B+, BeagleBone Black and RFDUINO. The ESP32 reports both WiFi and bluetooth technology built in, has multiple core processors and is the most cost-effective, [www.aliexpress.com](http://www.aliexpress.com), last accessed April 2018.

## 1.3 Pulse Width Modulation

Pulse width modulation (PWM) is used to control the direction of a servo valve. The width of the electrical pulse controls the angle of mechanical rotation. The pulse event occurs over a defined period of time, 50 Hz or every 20 ms [8]. The servo will stay in position for as long as the PWM is repeated. For example, if a 1 ms pulse of 5 V is applied to the servo, it will rotate to a position of 0°, conversely if the width is 2 ms a position of 180°, see Figure 2. In terms of precision, PWM is a digital signal that does not require analog conversion and is either 'on' or 'off', making it very precise compared to continuously variable analog signals. It is also resistant to noise because interference would need to be strong enough to change a logic 0 (LOW) to a logic 1 (HIGH) <sup>1</sup>, or vice versa.

## 1.4 Library

It is good practice to implement libraries into code to save time and increase efficiency, in this context, efficient means that use of the library does not impose significant learning curves on the user compared with entirely hand written code. To control servomechanisms a 'servo' library is used. All of the library's used are stated in the header of the C program.

<sup>1</sup>Throughout the manuscript 5 V TTL Logic Levels are used. This is defined by the ESP-32 microcontroller. TTL is an acronym for Transistor-Transistor Logic. It relies on circuits built from bipolar transistors to achieve switching and maintain logic states. Transistors are essentially electrically controlled switches.

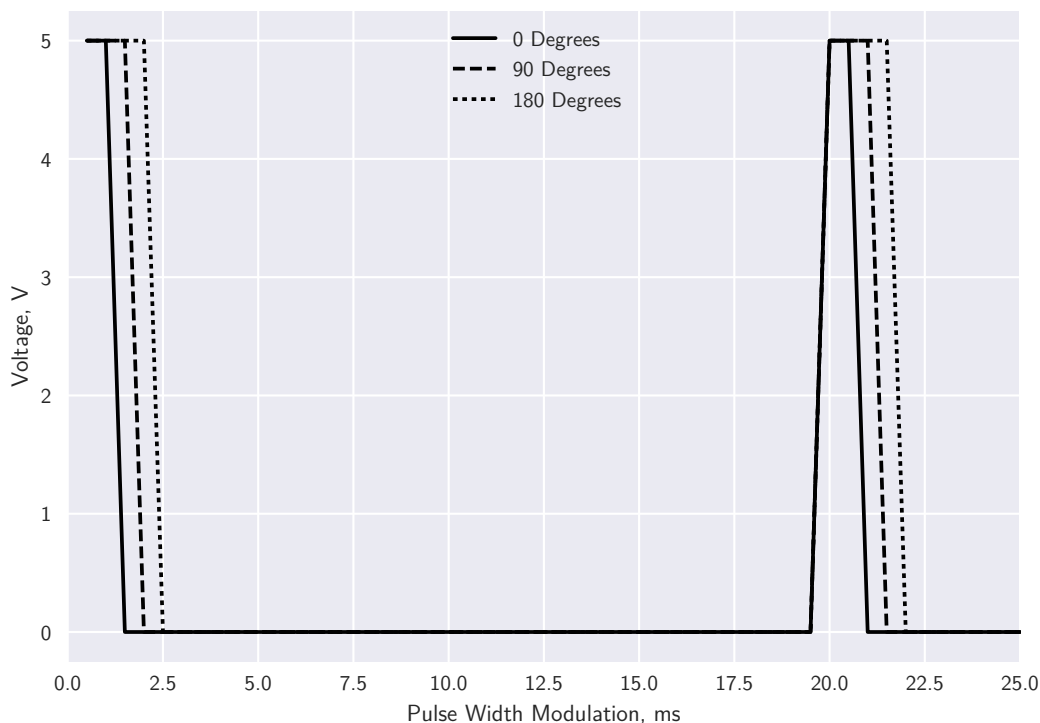

Figure 2: PWM graph for servo at frequency of 20 ms: 0° (—), 90° (---), 180° (.....).

## 1.5 Syringe Pump

Flow rate within the system is controlled by a syringe pump. Syringe pumps are commercially available and provide stable flow rates and greater precision over peristaltic pumps. Most syringe pumps have RS-232 connectivity, so the circuitry includes a MAX232 device for RS232 to TTL. Syringe pumps introduce slight fluctuations in flow rate and pressure in micro channels caused by a mechanical stepper motor which drives the syringe forward [9, 10]. Despite this, flow-rate control remains superior over pressure controlled methods when pumping in medical and microfluidic settings [11]. Communication with syringe pumps is established using serial protocols. Parity checks the state or condition of a received bit <sup>2</sup>, baud rate is the unit determining how fast data is sent over serial line and is measured in bits-per-second. Start and stop bits marked the beginning and end of data packets <sup>3</sup>. The manuscript used an Aladdin syringe pump that operated at specific serial parameters, Table 2.

<sup>2</sup>A form of low-level error checking, it slows down communication but is not necessary and is usually turned off.

<sup>3</sup>While there is always one start bit the number of stops can be either one or two (commonly left at one).

|           |                         |
|-----------|-------------------------|
| Baud Rate | 19200                   |
| Frame     | 10 bit data frame (8N1) |
| Start Bit | 1                       |
| Data Bits | 8                       |
| Stop Bits | 1                       |
| Parity    | None                    |

Table 2: RS-232 Protocol for World Precision Instruments Syringe Pump Model: AL1000

### 1.5.1 Syringe Pump Serial Connection

The RJ-11 port is present on the rear of the Aladdin AL-1000 syringe pump which is connected to the MAX232 microchip in the detailed circuit diagram in section 3.

### 1.5.2 ASCII Table

ASCII stands for American Standard Code for Information Interchange. In order to control the syringe pump, the conversion Table 3 is used to obtain hexadecimal values converted from plain text. The simplified ASCII Table shows only the numbers 0 to 9, and lowercase character letters a to z.

| Chr | Hex | Chr | Hex | Chr | Hex |
|-----|-----|-----|-----|-----|-----|
| 0   | 30  | c   | 63  | o   | 6F  |
| 1   | 31  | d   | 64  | p   | 70  |
| 2   | 32  | e   | 65  | q   | 71  |
| 3   | 33  | f   | 66  | r   | 72  |
| 4   | 34  | g   | 67  | s   | 73  |
| 5   | 35  | h   | 68  | t   | 74  |
| 6   | 36  | i   | 69  | u   | 75  |
| 7   | 37  | j   | 6A  | v   | 76  |
| 8   | 38  | k   | 6B  | w   | 77  |
| 9   | 39  | l   | 6C  | x   | 78  |
| a   | 61  | m   | 6D  | y   | 79  |
| b   | 62  | n   | 6E  | z   | 7A  |

Table 3: ASCII table

## 1.6 Flushing Protocol

| Step | Description               | Flow Rate                   | Time |
|------|---------------------------|-----------------------------|------|
| 1    | Flush detection chamber 1 | 2000 $\mu\text{l min}^{-1}$ | 3min |
| 2    | Flush detection chamber 2 | 2000 $\mu\text{l min}^{-1}$ | 3min |
| 3    | Flush detection chamber 3 | 2000 $\mu\text{l min}^{-1}$ | 3min |
| 4    | Flush detection chamber 4 | 2000 $\mu\text{l min}^{-1}$ | 3min |

Table 4: Flushing protocol

## 2 Characterisation of $[\text{Os}(2, 2' - \text{bipyridine})_2(\text{poly-vinylimidazole})_{10}\text{Cl}]^+$

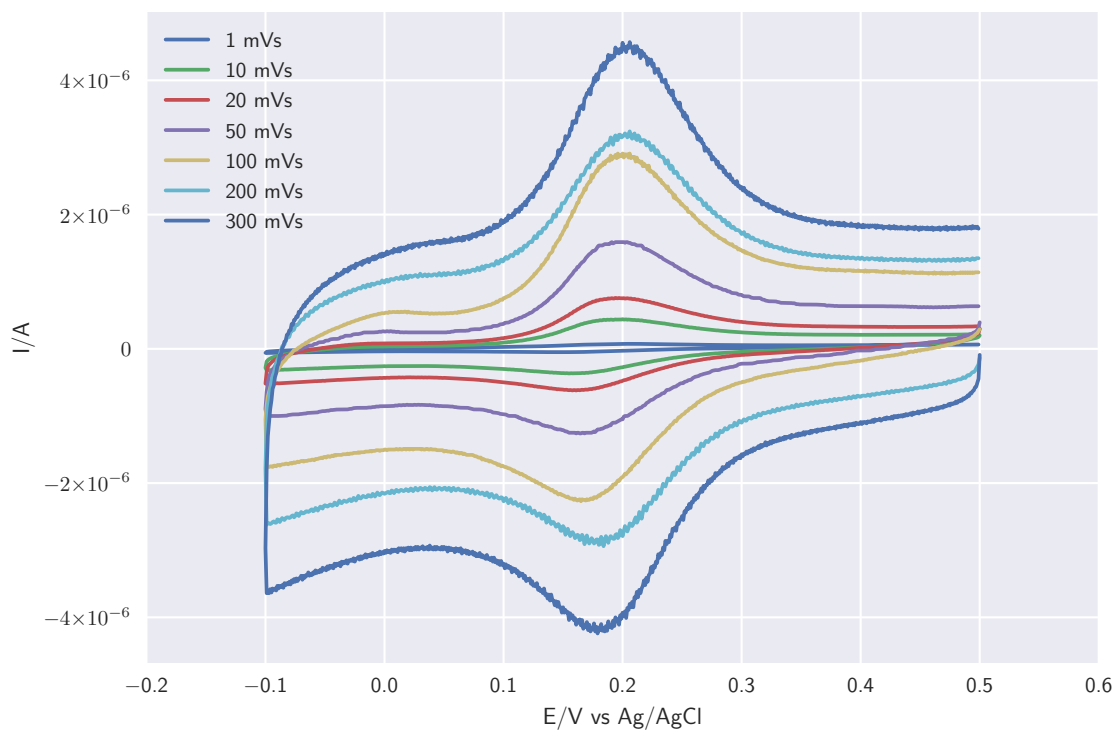

Figure 3: Various cyclic voltammograms of  $[\text{Os}(2, 2' - \text{bipyridine})_2(\text{poly-vinylimidazole})_{10}\text{Cl}]^+$   $5 \text{ mg ml}^{-1}$  redox polymer aqueous solution immobilized on 3 mm graphite electrodes and recorded using the CHI 1030 potentiostat

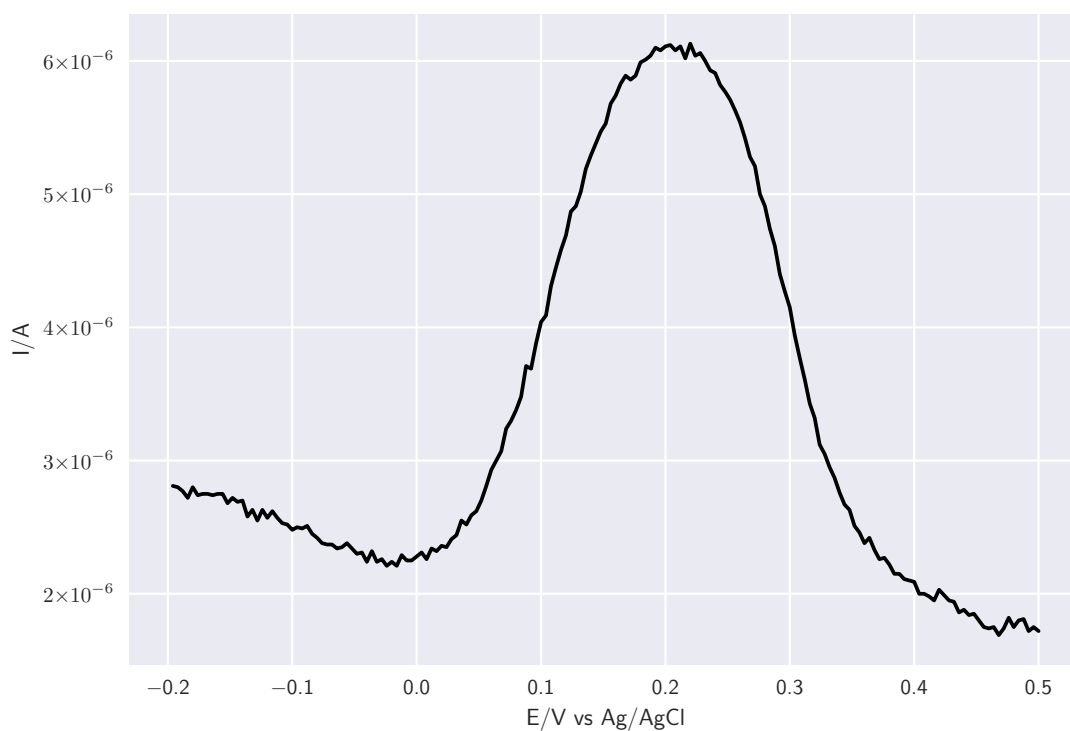

Figure 4: Differential pulse voltammogram of  $[\text{Os}(2, 2'\text{-bipyridine})_2(\text{poly-vinylimidazole})_{10}\text{Cl}]^+$   $5 \text{ mg ml}^{-1}$  redox polymer aqueous solution immobilized on 3 mm graphite electrodes and recorded using the CHI 1030 potentiostat



### 3 Operation in Artificial Plasma

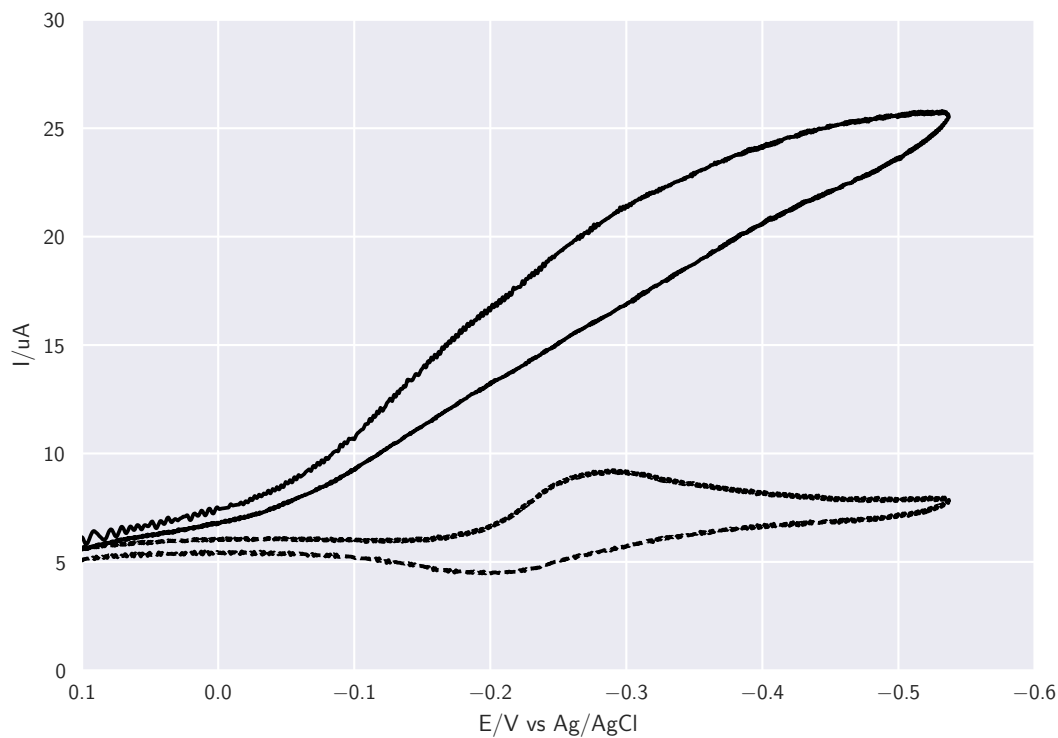

Figure 5: Slow scan ( $1 \text{ mV s}^{-1}$ ) CVs of films of  $[\text{Os}(2, 2' \text{-bipyridine})_2(\text{poly-vinylimidazole})_{10}\text{Cl}]^+$ , PEGDGE, MWCNTs and FADGDH on Kanichi electrodes in (---) absence of glucose in artificial plasma and (—) presence of 5mM glucose in artificial plasma. Recorded using the iMED

## 4 Electronics

### 4.1 Fixed Output Regulator

The LM79L05 voltage regulator used to provide a -5V potential to the circuitry was found to be unstable. To solve this a capacitor was added between the ground and Vout as detailed in the datasheet [12].

### 4.2 Digital-to-analog converter

The ESP-32 has a reported built in two channel 8-bit digital-to-analog converter (DAC) [1]. For true digital-to-analog conversion, important when applying a programmable potential via the potentiostat, we use an external MCP4725 DAC [13]. The key features of the MCP4725 DAC are; 12-bit resolution, fast settling time (0.6  $\mu$ s), 1 external channel, single-supply operation: 2.7 - 5.5 V, and I<sup>2</sup>C communication. The DAC is powered by 5 V to create a 5 V potential for the potentiostat circuit, this is necessary to increase the resolution of the potential window applied to the op-amps by an order of magnitude. This also overcomes the 3.3 V built in ESP-32 logic that would limit the potential window applied to the op-amp circuit for the potentiostat. The DAC requires a reference voltage (pin vcc), which must be stable, that is supplied via the reconfigured ATX power supply.

#### 4.2.1 DAC Price Comparison

| Component      | Resolution | Channels | Part Number | Price (USD) | Reference |
|----------------|------------|----------|-------------|-------------|-----------|
| MCP4725        | 12-bit     | 1        | 32618620065 | 0.65        |           |
| MSP430F449     | PWM        | -        | 32614768918 | 2.58        | [14],[15] |
| MAX5443BCUA    | 16-bit     | 1        | 32827261795 | 3.41        | [16],[17] |
| C8051F020      | 12-bit     | 2        | 32822808164 | 3.01        | [18],[19] |
| ATmega328P     | PWM        | -        | 32743536516 | 1.57        | [20],[3]  |
| ATXMEGA32A4-AU | 12-bit     | 2        | 32600120380 | 2.43        | [21],[22] |

Table 5: Price comparison of various digital-to-analog converters used in lab-built potentiostats, [www.aliexpress.com](http://www.aliexpress.com), last accessed April 2018. The MCP4725 is cost-effective with a 73% decrease in price from the ATXMEGA32A4-AU to the MCP4725. The ATXMEGA32A4-AU in this Table is used as an example because it is a true digital-to-analog converter closest in value to the MCP4725

### 4.3 Analog-to-digital converter

The ESP-32 has a reported 18 channel 12-bit analog-to-digital converter [1] (ADC). For increased resolution, important when measuring current using the potentiostat, we made obsolete the built in ADC and instead used an external ADS1115 ADC [23]. The key features of the ADS1115 ADC are; 16-bit resolution, between 8 to 860

---

samples per second, 4 input channels, a programmable gain amplifier (PGA), and I<sup>2</sup>C communication. The device has a number of programmable operating modes; samples per second (SPS) can be programmed within the range 8 to 860, important to note is this sets the amount of time a sample takes to read, and is not the frequency of sampling. For example, if the SPS is set to 128, each conversion will last for 1/128 seconds. This means that at lower sample rates the sample is read over a longer time period and the result of the conversion is the average of the input to the ADC over this period. This report uses 860 SPS because this is the fastest the ADC can read voltage, this is important when performing CV scan rate because a slower sampling speed may impact on the speed of the scan rate. The ADS1115 has 4 input channels, defined as A0-A3, that can be read simultaneously while operating in single ended or differential modes. Differential mode reads the voltage difference between two channels, and single ended reads the voltage difference between a single channel input and ground. This report uses four channels operating in single ended mode. The ADS1115 has a PGA. The voltage on the input pins passes through this amplifier before it enters the 16-bit ADC. The gain of this amplifier is programmable, therefore allows the measurement of small voltages with increased resolution, however, at the cost of a reduced measurement range. This report uses a 2/3x gain +/- 6.144V resulting in a 1 bit = 0.1875mV gain. This allows full use of the 5 V range of the op-amps.

#### 4.3.1 ADC Price Comparison

| Component       | Resolution | Channels | Part Number | Price (USD) | Reference  |
|-----------------|------------|----------|-------------|-------------|------------|
| ADS1115         | 16-bit     | 4        | 32817162654 | 1.99        |            |
| MSP430F449      | 12-bit     | 8        | 32614768918 | 2.58        | [14],[15]  |
| ADS1255IDBR     | 24-bit     | 2        | 32843087285 | 7.96        | [16],[24]  |
| C8051F020       | 12-bit     | 8        | 32822808164 | 3.01        | [18],[19]  |
| ATmega328P      | 10-bit     | 8        | 32743536516 | 1.57        | [20],[3]   |
| PIC16F877-04/PT | 10-bit     | 8        | 32727063880 | 2.38        | [25], [26] |
| ATXMEGA32A4-AU  | 12-bit     | 1        | 32600120380 | 2.43        | [21],[22]  |
| ATmega 644      | 10-bit     | 8        | 32703579081 | 2.02        | [27], [28] |

Table 6: Price comparison of various analog-to-digital converters used in lab-built potentiostats, [www.aliexpress.com](http://www.aliexpress.com), last accessed April 2018. The ADS1115 is cost-effective with an 18% decrease in price from the ATXMEGA32A4-AU to the ADS1115. The ATXMEGA32A4-AU in this Table is used as an example because it is an analog-to-digital converter of  $\leq$  resolution and closest in value to the ADS1115

#### 4.4 Bill of Materials

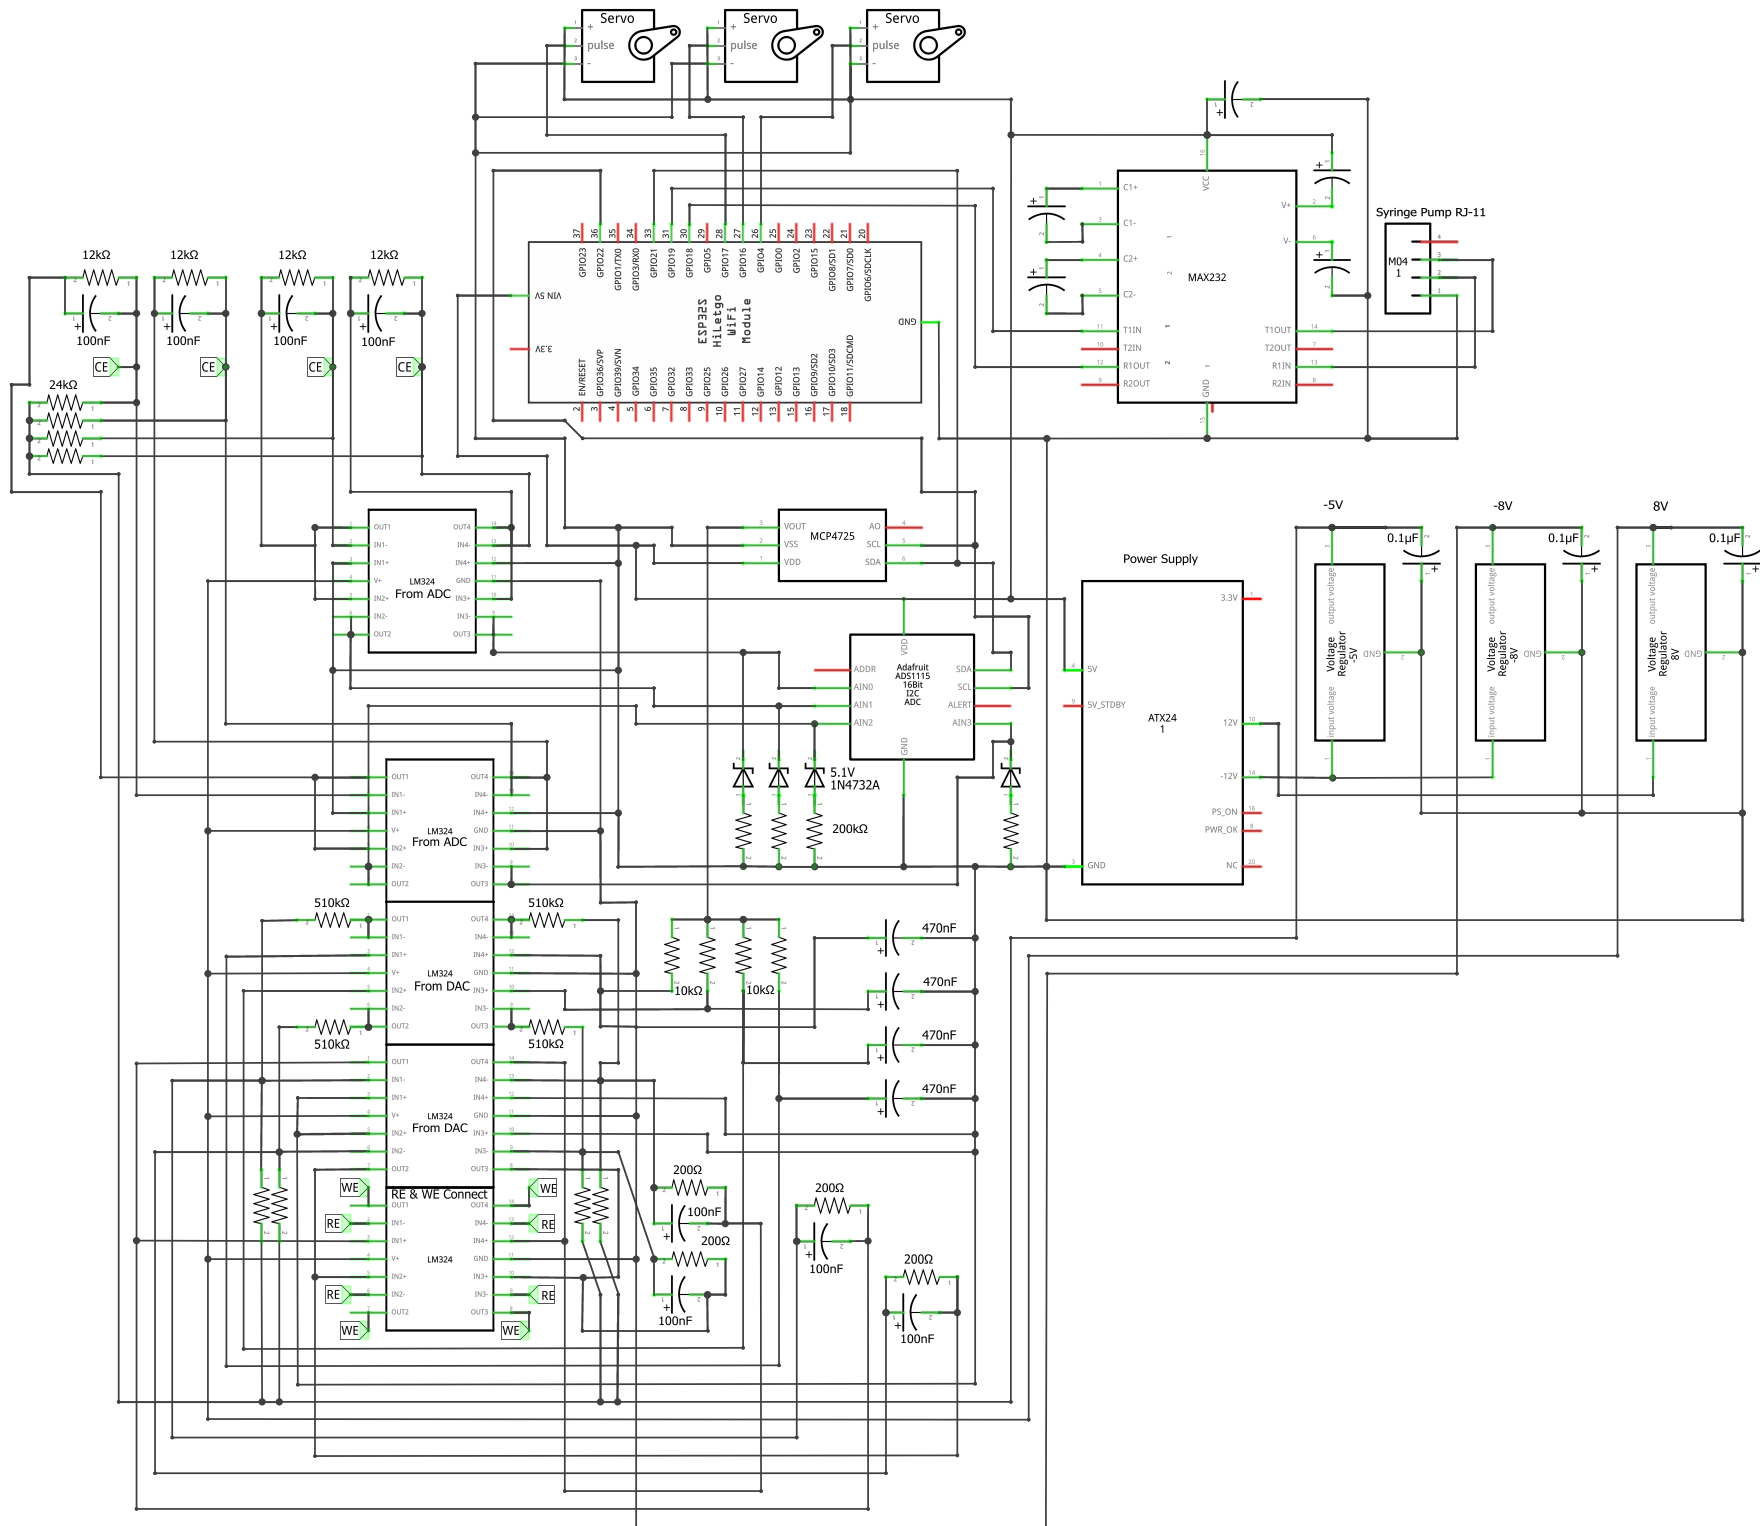

| Potentiostat                            |            |                  |             |
|-----------------------------------------|------------|------------------|-------------|
| Component                               | Vendor     | Part Number      | Price (USD) |
| ESP-32                                  | AliExpress | 32799954012      | 8.21        |
| Solderless Breadboard                   | AliExpress | 32801985959      | 0.75        |
| Resistor Assortment (600 Pcs)           | AliExpress | 32816049069      | 2.25        |
| Jumper Wire Assortment                  | Newark     | 99W1758          | 3.11        |
| LM324N op-amp (20 Pcs)                  | AliExpress | 32460833361      | 1.55        |
| 5V1 Zener Diode (100 Pcs)               | AliExpress | 32829392047      | 0.77        |
| ADS1115                                 | AliExpress | 32817162654      | 1.99        |
| MCP4725                                 | AliExpress | 32618620065      | 0.65        |
| MAX232 (10 Pcs)                         | AliExpress | 1702920370       | 1.50        |
| Ceramic Capacitors Assortment (300 Pcs) | AliExpress | 32659574417      | 3.98        |
| LM79L05                                 | AliExpress | 32838411757      | 2.27        |
| LM79L08                                 | Mouser     | 511-L79L08ACZ-AP | 1.53        |
| LM78L08                                 | Mouser     | 511-L78L08ABZ-AP | 1.42        |
| Total:                                  |            |                  | 29.98       |
| Microfluidics                           |            |                  |             |
| Aladdin AL-1000                         | WPI        | AL1000           | 660         |
| MG996R Servo Motor (3 Pcs)              | AliExpress | 32823408130      | 11.73       |
| PEEK tubing 1/16                        | IDEX       | 1531             | 16.81       |
| Fitting 1/16                            | IDEX       | 6000-254BL       | 49.97       |
| Ferrule 1/16                            | IDEX       | P-840            | 1.28        |
| 100 uL sample loop                      | IDEX       | 9055-024         | 41.43       |
| 4-way switching valve (3 Pcs)           | IDEX       | V-101D           | 112.78      |
| SYLGARD 184 (PDMS kit)                  | Sigma      | 761036-5EA       | 161.50      |
| Total:                                  |            |                  | 1393.84     |

Table 7: Bill of Materials list, [www.aliexpress.com](http://www.aliexpress.com), [www.newark.com](http://www.newark.com), [www.adafruit.com](http://www.adafruit.com), [www.idex-hs.com](http://www.idex-hs.com), [www.wpi-europe.com](http://www.wpi-europe.com), [www.sigmaaldrich.com](http://www.sigmaaldrich.com), [www.mouser.com](http://www.mouser.com) last accessed January 2018

## 5 C Programs

### 5.1 Online Repository

The C Programs contained within this SI have an MIT license. All program files are also uploaded to a Github repository<sup>4</sup> in an effort to improve the re-usability of this work.

### 5.2 CP210x USB to UART Bridge VCP Drivers

1. A driver needs to be installed onto any Windows/Macintosh OSX/Linux/Android platform in order to upload code to the ESP-32
2. Install the latest CP210x USB to UART Bridge VCP Drivers from: <https://www.silabs.com/products/development-tools/software/usb-to-uart-bridge-vcp-drivers>
3. Once the CP210x driver is installed the computer platform can be used to communicate with ESP-32 via a micro USB cable

### 5.3 Installing Arduino ESP32

1. Install the latest Arduino integrated development environment (IDE) software version 1.8.5 or later<sup>5</sup> onto Windows
2. Install the latest Git software<sup>6</sup> onto Windows
3. Run the GIT GUI program
4. Select '*Clone Existing Repository*'
5. Enter into the field '*Source Location*' the following: <https://github.com/espressif/arduino-esp32.git>
6. Enter into the field '*Target Directory*' the following<sup>7</sup>: '[\[ARDUINO\\_SKETCHBOOK\\_DIR\]](#) /hardware/ [espressif/esp32](#)'
7. Click '*Clone*' to start cloning the repository
8. Open Git Bash program and enter: '[\[ARDUINO\\_SKETCHBOOK\\_DIR\]](#) /hardware/ [espressif/esp32](#)' and execute git submodule update –init –recursive
9. Open '[\[ARDUINO\\_SKETCHBOOK\\_DIR\]](#) /hardware/ [espressif/esp32/tools](#)' and double-click get.exe
10. When get.exe finishes, plug in ESP32 board via USB and wait for Windows to install drivers

---

<sup>4</sup><https://github.com/ConanMercer/Wireless-Potentiostat>

<sup>5</sup><https://www.arduino.cc/en/main/software>

<sup>6</sup><https://git-scm.com/download/win>

<sup>7</sup>Sketchbook Directory: Usually C:/Users/[YOUR\_USER\_NAME]/Documents/Arduino

---

11. Full documentation on how to use the Arduino ESP32 Core can be found on the Internet <sup>8</sup>

### 5.3.1 Setting Board Specifications

Select the following settings once the Arduino ESP32 is installed, settings found in tools drop down menu in the Arduino IDE program.

1. Board: *'ESP32 Dev module'*
2. Flash Mode: *'QIO'*
3. Flash Frequency: *'80 MHz'*
4. Flash Size: *'4MB (32Mb)'*
5. Upload Speed: *'921600'*
6. Core Debug Level: *'None'*

### 5.4 Setup WiFi Manager

Instead of hard coding the WiFi credentials into the ESP-32 that would require reprogramming the device every time a new WiFi network connection is desired, a WiFi manager library is used to allow connection to a WiFi network where the user can use a smart phone or other device. When the ESP-32 is booted it will attempt to connect to the last successfully connected WiFi network. If this fails the ESP-32 will start up an access point (AP) mode. Once in AP mode, the user can use a smart phone or any WiFi enabled device (computer, laptop, tablet) with a web browser to navigate to the default IP address which is **192.168.4.1**, once connected to the address a configuration window will display allowing the user to type the WiFi credentials of the network desired for connection to by the ESP-32, see Figure 6. Once the credentials have been entered, the ESP-32 will connect to the specified WiFi network.

Follow the settings below to include the WiFi manager library in the ESP-32 program.

1. Download and install this library found on a GitHub repository <https://github.com/zhouhan0126/WIFIMANAGER-ESP32>
2. Open Arduino IDE software
3. Verify that WiFi manger has been installed locating WiFi manager in Select Sketch > Include Library

---

<sup>8</sup><https://github.com/espressif/arduino-esp32>

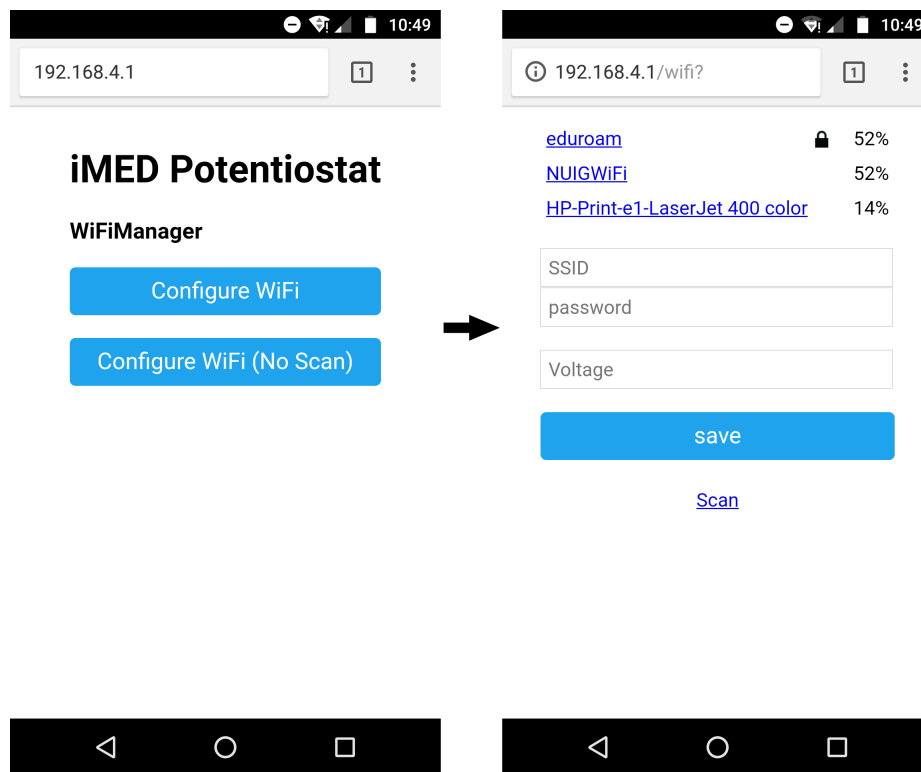

Figure 6: Screenshot showing the iMED which is connected to a smartphone via WiFi. The web browser viewed using the smartphone controls the input of the WiFi credentials and the voltage to be applied during amperometry.

## 5.5 Setup Over the Air updates

The Arduino OTA library is integrated into the ESP32 library, see section 5.3. This OTA library facilitates the iMED to update itself via WiFi based on data received while the normal firmware is running. Briefly, OTA works by configuring the partition table of the ESP32 with at least two 'OTA image' partitions and an 'OTA data partition'. The OTA operation function writes a new firmware image to whichever OTA image slot is not currently being used for booting. Once the image is verified, the OTA Data partition is updated to specify that this image should be used for the next boot, and then the device reboots itself, running the updated C program, detailed in Figure 7.

Follow the settings below to upload programs via OTA with the Arduino IDE.

1. Select Tools > Port > OTA ESP32 at 192.168.1.94 (ESP Dev Module)
2. Upload the Arduino program as normal

## 5.6 Setup ThingSpeak Channel

Follow the settings in the supporting information of our previously published work [29] for a detailed description of how to setup a ThinkSpeak channel.



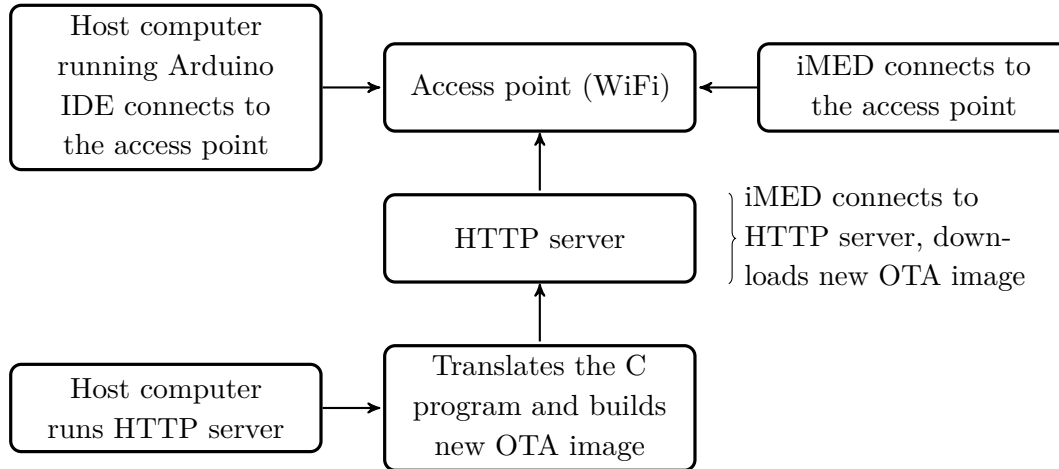

Figure 7: Diagram showing the overall work-flow of 'over the air' updates.

## 5.7 Syntax

The ESP-32 microcontroller is programmed in C/C++ language that is uploaded via the Arduino IDE. Libraries are used to simplify C programs. A library in C is a group of functions and declarations, exposed for use by other programs. The library therefore consists of an interface expressed in a .h file, and are stated in the header of the code that wishes to call a library (see lines 9 - 27 of C program in supporting information). The Arduino ESP32 board manager comes with libraries to communicate with wireless Wi-Fi using TCP protocols<sup>9</sup>, and wired SPI<sup>10</sup> and I<sup>2</sup>C<sup>11</sup> peripherals. Other library's used in his report include, `adafruit_ADS1015.h`, `Adafruit_MCP4725.h`, `HardwareSerial.h`, `Servo.h`. The C program requires two basic functions to run correctly, `setup()` and `loop()`. Setup is called first when the code is run and it is used to initiate pin modes and begin any communication such as serial. The setup must be included, regardless if statements are present. The loop is called to run after setup and is a powerful function that loops consecutively. The loop function responds to inputs and controls the ESP-32 board. By using FreeRTOS task (included in the Arduino ESP32 board manager) a program can assign tasks to specific cores on the ESP-32. The `'xTaskCreatePinnedToCore'` function is used to assign ADC and DAC modules to separate cores. Several attribute parameters can be defined, such as the task function, name, stack size, priority, handle, as well as the specific core to run on the task on.

<sup>9</sup>Transmission Control Protocol (TCP) is a Internet connection that once established, can send data in a bidirectional mode.

<sup>10</sup>Serial Peripheral Interface bus (SPI) is a synchronous serial communication interface specification used for short distance communication, primarily in embedded computer systems.

<sup>11</sup>I<sup>2</sup>C is also used for short distance communication for lower-speed peripheral ICs attached to microcontrollers.

```
1 readChannelID = CHANNEL-ID; % TODO - replace CHANNEL-ID with your ThingSpeak
  channel ID
2 CurrentFieldID = 2;
3 readAPIKey = 'CHANNEL-READAPIKEY'; % TODO - replace CHANNEL-READAPIKEY with
  your ThingSpeak channel read API key
4
5 CurrentData = thingSpeakRead(readChannelID, 'Fields', CurrentFieldID, 'ReadKey
  ', readAPIKey);
6
7 x = linspace(0,0.1,length(CurrentData)); % Generate linearly spaced time
  vector for x axis equal to length of y input data
8
9 thingSpeakScatter(x, CurrentData, 'xlabel', 'Time, s', 'ylabel', 'I, A '); %
  Graph amperometric data
```

Listing 1: MATLAB code

## 5.8 JavaScript Object Notation

For a detailed description of JavaScript Object Notation (JSON) and using JSON with ThingSpeak, follow the supporting information of our previously published work [29].

## 5.9 MATLAB Visualizations

MATLAB integration with ThinkSpeak is used to plot amperometric data from the iMED. MATLAB code is detailed in Listing 1. A screenshot of the MATLAB graphical visualization taken on a smartphone is detailed in Figure 8.

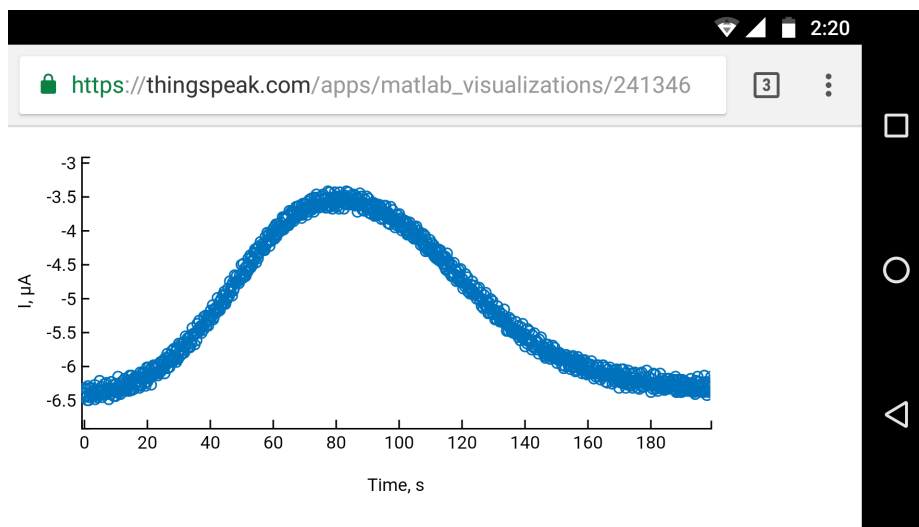

Figure 8: Screenshot showing the iMED which is connected to a smartphone via WiFi. The web browser viewed using the smartphone displays the MATLAB graphical visualization of amperometric data from the iMED.

## 5.10 C Programs

```
1 //-----
2 // --- iMED code written by Conan Mercer 2018. National University of Ireland
   Galway
3 // --- For over the air upload to ESP-32 microcontroller and Thingspeak upload
4 //-----
5
6 //-----
7 // --- Libraries
8 //-----
9 #include <Servo.h>           // Communicate with servo-valves
10 #include <HardwareSerial.h> // To utilise all of ESP32 hardware UARTs
11 #include <Wire.h>           // Serial communicate with I2C / TWI devices
12 #include <Adafruit_ADS1015.h> // Driver for ADS1115 16-bit ADC
13 #include <Adafruit_MCP4725.h> // Driver for MCP4725 12-bit DAC
14 //For smart phone connection
15 #include "SPIFFS.h"
16 #include <WiFi.h>
17 #include <DNSServer.h>
18 #include <ESP8266WebServer.h>
19 #include <WiFiManager.h>
20 #include <ArduinoJson.h>
21 //For OTA updates
22 #include <ESPmDNS.h>
23 #include <WiFiUdp.h>
24 #include <ArduinoOTA.h>
25 #include "credentials.h"
26 #include <stdlib.h>
27 #include <stdio.h>
28
29 //-----
30 // --- Variables and settings
31 //-----
32
33 Adafruit_ADS1115 ads(0x49); // Construct the ADS1115 at address 0x49
34 Adafruit_MCP4725 dac;      // Construct the MCP4725
35
36 WiFiClient client;        // Initialize WiFi client library
37 char server[] = "api.thingspeak.com"; // ThingSpeak Server address
38
39 Servo servo1;             // Define servo-valves
40 Servo servo2;
41 Servo servo3;
42
43 HardwareSerial PumpSerial(1); // Define hardware UARTs
44
45 /* Collect data once every 500 milliseconds and post data to ThingSpeak
   channel once every 16 seconds */
46 unsigned long lastConnectionTime = 0; // Track the last
   connection time
47 unsigned long previousUpdate = 0;    // Track the last update
   time
48 const unsigned long postingInterval = 16L * 1000L; // Post data every 16
   seconds
```

---

```
49 const unsigned long updateInterval = 0.5L * 1000L; // Update JSON once every
    50ms
50
51 /* Multi core tasks */
52 TaskHandle_t Task1, Task2;
53
54 int16_t adc0, adc1, adc2, adc3; // Signed integer type with width of 16 bits
    for ADC using four channels
55 uint32_t dac_value; // Unsigned integer type with width of 32 bits
    for DAC values
56
57 //flag for saving data
58 bool shouldSaveConfig = false;
59
60 //callback notifying the need to save config
61 void saveConfigCallback () {
62     Serial.println("Should save config");
63     shouldSaveConfig = true;
64 }
65
66 char jsonBuffer[1500] = "["; // Initialize the jsonBuffer to hold data
67 char Voltage[2890] = ""; // Variable for control of DAC output set
    to 0.4V, this can be changed in wifimanager via iMED access point
68 float c1 = 0; // Variable for storage of current reading channel 1
69 float c2 = 0; // Variable for storage of current reading channel 2
70 float c3 = 0; // Variable for storage of current reading channel 3
71 float c4 = 0; // Variable for storage of current reading channel 4
72 float v = 0; // Variable for storage of voltage applied
73 float A = 0.01527; // Variable for storage of slope current conversion
    200uA
74 float B = 200; // Variable for storage of intersect current
    conversion 200uA
75 float M = 0.000504637; // Variable for storage of voltage multiplier
76 float O = 1.01562452; // Variable for storage of voltage offset
77 float E = 0; // Variable for storage of voltage converter
78 byte pumpStop[] = {0x73, 0x74, 0x70, 0x0d, 0x0a}; //Pump stop
79 byte pump100ul[] = {0x72, 0x61, 0x74, 0x31, 0x30, 0x30, 0x75, 0x6d, 0x0d, 0x0a
    , 0x72, 0x75, 0x6e, 0x0d, 0x0a}; //Pump 100 ul/min
80
81 //-----
82 // --- iMED initialisation
83 //-----
84
85 void setup() {
86     Serial.begin(115200); // Initiate serial communication to ESP-12E at
    112500 baud rate
87     SPIFFS.begin (true);
88     //read configuration from FS json
89     Serial.println("mounting FS...");
90     if (SPIFFS.begin()) {
91         Serial.println("mounted file system");
92         if (SPIFFS.exists("/config.json")) {
93             //file exists, reading and loading
94             Serial.println("reading config file");
95             File configFile = SPIFFS.open("/config.json", "r");
96             if (configFile) {
```

```
97     Serial.println("opened config file");
98     size_t size = configFile.size();
99     // Allocate a buffer to store contents of the file.
100     std::unique_ptr<char[]> buf(new char[size]);
101
102     configFile.readBytes(buf.get(), size);
103     DynamicJsonBuffer jsonBuffer1;
104     JsonObject& json = jsonBuffer1.parseObject(buf.get());
105     json.printTo(Serial);
106     if (json.success()) {
107         Serial.println("\nparsed json");
108
109         strcpy(Voltage, json["Voltage"]);
110     } else {
111         Serial.println("failed to load json config");
112     }
113 }
114 }
115 } else {
116     Serial.println("failed to mount FS");
117 }
118 //end read
119 WiFiManagerParameter custom_Voltage("Voltage", "Voltage", Voltage, 40);
120 //Local intialization. Once its business is done, there is no need to keep
121 //it around
122 WiFiManager wifiManager;
123 //set config save notify callback
124 wifiManager.setSaveConfigCallback(saveConfigCallback);
125 //add all parameters here
126 wifiManager.addParameter(&custom_Voltage);
127
128 if (!wifiManager.autoConnect("iMED Potentiostat")) {
129     Serial.println("failed to connect and hit timeout");
130     delay(3000);
131     //reset
132     ESP.restart();
133     delay(5000);
134 }
135
136 //if you get here you have connected to the WiFi
137 Serial.println("connected...");
138
139 //read updated parameters
140 strcpy(Voltage, custom_Voltage.getValue());
141
142 //save the custom parameters to FS
143 if (shouldSaveConfig) {
144     Serial.println("saving config");
145     DynamicJsonBuffer jsonBuffer1;
146     JsonObject& json = jsonBuffer1.createObject();
147     json["Voltage"] = Voltage;
148     File configFile = SPIFFS.open("/config.json", "w");
149     if (!configFile) {
150         Serial.println("failed to open config file for writing");
151     }
152     json.printTo(Serial);
```

```
152     json.printTo(configFile);
153     configFile.close();
154     Serial.println("Voltage");
155     //end save
156 }
157
158 //-----
159 // --- Setup needed for OTA
160 //-----
161 ArduinoOTA.onStart([]() {
162     String type;
163     if (ArduinoOTA.getCommand() == U_FLASH)
164         type = "sketch";
165     else // U_SPIFFS
166         type = "filesystem";
167     // NOTE: if updating SPIFFS this would be the place to unmount SPIFFS
168     // using SPIFFS.end()
169     Serial.println("Start updating " + type);
170 });
171 ArduinoOTA.onEnd([]() {
172     Serial.println("\nEnd");
173 });
174 ArduinoOTA.onProgress([](unsigned int progress, unsigned int total) {
175     Serial.printf("Progress: %u%%\r", (progress / (total / 100)));
176 });
177 ArduinoOTA.onError([](ota_error_t error) {
178     Serial.printf("Error[%u]: ", error);
179     if (error == OTA_AUTH_ERROR) Serial.println("Auth Failed");
180     else if (error == OTA_BEGIN_ERROR) Serial.println("Begin Failed");
181     else if (error == OTA_CONNECT_ERROR) Serial.println("Connect Failed");
182     else if (error == OTA_RECEIVE_ERROR) Serial.println("Receive Failed");
183     else if (error == OTA_END_ERROR) Serial.println("End Failed");
184 });
185 ArduinoOTA.begin();
186 Serial.println("Ready");
187 Serial.print("IP address: ");
188 Serial.println(WiFi.localIP());
189
190 /* Core 0 task */
191 xTaskCreatePinnedToCore(
192     core0Task,           /* task function. */
193     "core0",            /* name of task. */
194     10000,              /* stack size of task */
195     NULL,               /* parameter of the task */
196     1,                  /* priority of the task */
197     &Task1,             /* task handle to keep track of created task */
198     0);                 /* Core */
199
200 delay(500);            /* needed to start-up Core 1 task */
201
202 /* Core 1 task */
203 xTaskCreatePinnedToCore(
204     core1Task,           /* task function. */
205     "core1",            /* name of task. */
206     10000,              /* stack size of task */
207     NULL,               /* parameter of the task */
```

```
207     1,                                /* priority of the task */
208     &Task2,                             /* task handle to keep track of created task */
209     1);                                  /* Core */
210
211 //-----
212 // --- Servo-valve controls
213 //-----
214 chamber1();    // Change flow into detection chamber 1
215 //chamber2();  // Change flow into detection chamber 2
216 //chamber3();  // Change flow into detection chamber 3
217 //chamber4();  // Change flow into detection chamber 4
218
219 //-----
220 // --- Servo-valve controls
221 //-----
222 PumpSerial.begin(19200, SERIAL_8N1, 19, 18);    // RS-232 Protocol for
           Aladdin Syringe Pump Model: AL-1000
223 PumpSerial.write(pump100ul, sizeof(pump100ul)); // Initiate pumping at 100
           ul/min
224 Wire.begin(21, 22);                          // I2C Pins on ESP32
225 ads.begin();                                  // Initiate ADS1115 ADC
226 dac.begin(0x62);                              // Initiate MCP4725 DAC
227 Wire.setClock(400000L);                       // Set i2c to 400 kHz
228 ads.setGain(GAIN_TWOTHIRDS);                 // 2/3x gain +/- 6.144V 1 bit = 0.1875mV
229 //ads.setSPS(ADS1115_DR_860SPS); // Set ADS1115 samples per second to 860 (
           effects scan rate speed)
230 E = atoi(Voltage);                            // convert char to int for use with DAC
231 dac.setVoltage(E, false);                     // Set potential, false = don't save to EEPROM
232 }
233
234 //-----
235 // --- This function will read the current using core 1
236 //-----
237 void core0Task( void * parameter )
238 {
239     /* loop forever */
240     for (;;) {
241
242         if ( millis() - previousUpdate >= updateInterval) {
243             updatesJson(jsonBuffer);
244         }
245     }
246     /* delete a task when finish ,
247        this will never happen because this is infinity loop */
248     vTaskDelete( NULL );
249 }
250
251 //-----
252 // --- This function will read the voltage using core 2
253 //-----
254 void core1Task( void * parameter )
255 {
256     /* loop forever */
257     for (;;) {
258         voltageT();
259     }
```

---

```
260  /* delete a task when finish ,
261     this will never happen because this is infinity loop */
262  vTaskDelete( NULL );
263 }
264
265 void loop() {
266 }
267
268 //-----
269 // --- Checks for a wireless OTA update and computes Voltage
270 //-----
271 void voltageT()
272 {
273   ArduinoOTA.handle();
274   yield();
275   delay(10);
276   v = ((E * M) - O);
277 }
278
279 //-----
280 // --- Calls potential reading according to 'updateInterval'
281 //-----
282 void potential()
283 {
284   if (millis() - previousUpdate >= updateInterval) {
285     updatesJson(jsonBuffer);
286   }
287 }
288
289 //-----
290 // --- Updates JSON with data
291 //-----
292
293 void updatesJson(char* jsonBuffer) {
294   v = ((E * M) - O);
295   adc0 = ads.readADC_SingleEnded(0);
296   //adc1 = ads.readADC_SingleEnded(1);
297   //adc2 = ads.readADC_SingleEnded(2);
298   //adc3 = ads.readADC_SingleEnded(3);
299   c1 = -((A * (adc0)) - B); // Current reading output in A channel 1
300   //c2 = -((A * (adc1)) - B); // Current reading output in A channel 2
301   //c3 = -((A * (adc2)) - B); // Current reading output in A channel 3
302   //c4 = -((A * (adc3)) - B); // Current reading output in A channel 4
303   Serial.print(v, 4);
304   Serial.print(",");
305   Serial.println(c1, 3);
306   // Format the jsonBuffer as noted above
307   strcat(jsonBuffer, "{\"delta_t\":");
308   unsigned long deltaT = (millis() - previousUpdate) / 1000;
309   size_t lengthT = String(deltaT).length();
310   char temp[8];
311   String(deltaT).toCharArray(temp, lengthT + 1);
312   strcat(jsonBuffer, temp);
313   strcat(jsonBuffer, ",");
314   strcat(jsonBuffer, "\"field1\":");
315   lengthT = String(c1).length();
```

---



```
316 String(v).toCharArray(temp, lengthT + 1); // Data uploaded to ThingSpeak
      channel field 1
317 strcat(jsonBuffer, temp);
318 strcat(jsonBuffer, ",");
319 strcat(jsonBuffer, "\"field2\":");
320 String(c1).toCharArray(temp, lengthT + 1); // Data uploaded to ThingSpeak
      channel field 2
321 strcat(jsonBuffer, temp);
322 strcat(jsonBuffer, "},");
323 // If posting interval time has reached 16 seconds, update the ThingSpeak
      channel with data
324 if (millis() - lastConnectionTime >= postingInterval) {
325     size_t len = strlen(jsonBuffer);
326     jsonBuffer[len - 1] = ',';
327     httpRequest(jsonBuffer);
328 }
329 previousUpdate = millis(); // Update the last update time
330 }
331
332 //-----
333 // --- Updates the ThingSpeak open-source server channel with data
334 //-----
335 void httpRequest(char* jsonBuffer) {
336     // Format the data buffer as noted above
337     char data[1500] = "{\"write_api_key\":\"YOUR-CHANNEL-WRITEAPIKEY\",\"updates
      \":\""; // Replace YOUR-CHANNEL-WRITEAPIKEY with your ThingSpeak channel
      write API key
338     strcat(data, jsonBuffer);
339     strcat(data, "}");
340     // Close any connection before sending a new request
341     client.stop();
342     String data_length = String(strlen(data) + 1); //Compute the data buffer
      length
343     Serial.println(data);
344     // POST data to ThingSpeak
345     if (client.connect(server, 80)) {
346         client.println("POST /channels/YOUR-CHANNEL-ID/bulk_update.json HTTP/1.1")
          ; // Replace YOUR-CHANNEL-ID with your ThingSpeak channel ID
347         client.println("Host: api.thingspeak.com");
348         client.println("User-Agent: mw.doc.bulk-update (Arduino ESP8266)");
349         client.println("Connection: close");
350         client.println("Content-Type: application/json");
351         client.println("Content-Length: " + data_length);
352         client.println();
353         client.println(data);
354     }
355     jsonBuffer[0] = ','; // Reinitialize the jsonBuffer for
      next batch of data
356     jsonBuffer[1] = '\0';
357     lastConnectionTime = millis(); // Update the last connection time
358 }
359
360 //-----
361 // --- Servo-valve control subroutines
362 //-----
363 void chamber1() {
```

---

```
364  servo1.attach(17);
365  servo2.attach(16);
366  servo1.write(150);      // Turn 1st Servo right to 150 degrees (directs to
                           chamber 1)
367  servo2.write(70);      // Turn 2nd Servo left to 60 degrees (directs to
                           chamber 1)
368  delay(2000);
369  servo1.detach();
370  servo2.detach();
371 }
372 void chamber2() {
373  servo1.attach(17);
374  servo3.attach(4);
375  servo1.write(40);      // Turn 1st Servo left to 40 degrees (directs to
                           chamber 2)
376  servo3.write(160);    // Turn 3rd Servo left to 160 degrees (directs to
                           chamber 2)
377  delay(2000);
378  servo1.detach();
379  servo3.detach();
380 }
381 void chamber3() {
382  servo1.attach(17);
383  servo2.attach(16);
384  servo1.write(150);    // Turn 1st Servo right to 150 degrees (directs to
                           chamber 3)
385  servo2.write(180);    // Turn 2nd Servo left to 60 degrees (directs to
                           chamber 3)
386  delay(2000);
387  servo1.detach();
388  servo2.detach();
389 }
390 void chamber4() {
391  servo1.attach(17);
392  servo3.attach(4);
393  servo1.write(40);      // Turn 1st Servo left to 40 degrees (directs to
                           chamber 4)
394  servo3.write(50);     // Turn 3rd Servo left to 50 degrees (directs to
                           chamber 4)
395  delay(2000);
396  servo1.detach();
397  servo3.detach();
398 }
```

## References

- [1] Espressif, [ESP32 Datasheet](#) (2018).  
URL [https://www.espressif.com/sites/default/files/documentation/esp32\\_datasheet\\_en.pdf](https://www.espressif.com/sites/default/files/documentation/esp32_datasheet_en.pdf)
  - [2] Espressif, [ESP8266EX Datasheet](#) (2017).  
URL [https://www.espressif.com/sites/default/files/documentation/0a-esp8266ex\\_datasheet\\_en.pdf](https://www.espressif.com/sites/default/files/documentation/0a-esp8266ex_datasheet_en.pdf)
  - [3] Atmel, [ATmega328 / P Datasheet](#) (2016). doi:10.1104/pp.108.130294.  
URL [ww1.microchip.com/downloads/en/DeviceDoc/Atmel-42735-8-bit-AVR-Microcontroller-ATmega328-328P\\_Summary.pdf](http://ww1.microchip.com/downloads/en/DeviceDoc/Atmel-42735-8-bit-AVR-Microcontroller-ATmega328-328P_Summary.pdf)
  - [4] Freescale Semiconductor, [K20P64M72SF1 Datasheet](#) (2012). arXiv:arXiv:1011.1669v3, doi:10.1002/ejoc.201200111.
  - [5] Adafruit, [Introducing the Raspberry Pi Model B+ Datasheet](#) (2015).  
URL <https://cdn-shop.adafruit.com/datasheets/pi-specs.pdf>
  - [6] Texas Instruments, [AM335x ARM <sup>®</sup> Cortex <sup>™</sup> -A8 Microprocessors \(MPUs\) Datasheet](#) (2011).
  - [7] A. Ainla, M. P. S. Mousavi, M.-N. Tsaloglou, J. Redston, J. G. Bell, M. T. Fernández-Abedul, G. M. Whitesides, [Open-Source Potentiostat for Wireless Electrochemical Detection with Smartphones](#), Anal. Chem. 90 (10) (2018) 6240–6246. doi:10.1021/acs.analchem.8b00850.  
URL <http://pubs.acs.org/doi/10.1021/acs.analchem.8b00850>
  - [8] TowerPro, [MG996R High Torque Metal Gear Dual Ball Bearing Servo Datasheet](#) (2018).  
URL [https://www.electronicoscaldas.com/datasheet/MG996R\\_Tower-Pro.pdf](https://www.electronicoscaldas.com/datasheet/MG996R_Tower-Pro.pdf)
  - [9] Z. Li, S. Y. Mak, A. Sauret, H. C. Shum, [Syringe-pump-induced fluctuation in all-aqueous microfluidic system implications for flow rate accuracy](#), Lab Chip 14 (4) (2014) 744. doi:10.1039/c3lc51176f.  
URL <http://www.ncbi.nlm.nih.gov/pubmed/24382584><http://xlink.rsc.org/?DOI=c3lc51176f>
  - [10] W. Zeng, I. Jacobi, D. J. Beck, S. Li, H. A. Stone, [Characterization of syringe-pump-driven induced pressure fluctuations in elastic microchannels](#), Lab Chip 15 (4) (2015) 1110–1115. doi:10.1039/C4LC01347F.  
URL [www.rsc.org/lohttp://xlink.rsc.org/?DOI=C4LC01347F](http://www.rsc.org/lohttp://xlink.rsc.org/?DOI=C4LC01347F)
  - [11] T. Ward, M. Faivre, M. Abkarian, H. A. Stone, [Microfluidic flow focusing: Drop size and scaling in pressure versus flow-rate-driven pumping](#), Electrophoresis 26 (19) (2005) 3716–3724. doi:10.1002/elps.200500173.  
URL <http://doi.wiley.com/10.1002/elps.200500173>
-

- [12] T. Instruments, [LM79LXXAC Series 3-Terminal Negative Regulators](#) (2013).  
URL <http://www.ti.com/lit/ds/symlink/lm79l.pdf>
- [13] Microchip Technology Inc, 12-Bit DAC with EEPROM Memory in SOT-23-6 (2009).
- [14] S. Kwakye, A. Baeumner, [An embedded system for portable electrochemical detection](#), *Sensors Actuators B Chem.* 123 (1) (2007) 336–343. doi:10.1016/j.snb.2006.08.032.  
URL <http://linkinghub.elsevier.com/retrieve/pii/S0925400506005764>
- [15] T. Instruments, MSP430x43x, MSP430x43x1, MSP430x44x Mixed Signal Microcontroller (2009).
- [16] M. D. M. Dryden, A. R. Wheeler, [DStat: A Versatile, Open-Source Potentiostat for Electroanalysis and Integration](#), *PLoS One* 10 (10) (2015) e0140349. doi:10.1371/journal.pone.0140349.  
URL <http://dx.plos.org/10.1371/journal.pone.0140349>
- [17] M. Integrated, +3V/+5V Serial-Input Voltage-Output 16-Bit DAC (2009).
- [18] C.-Y. Huang, M.-J. Syu, Y.-S. Chang, C.-H. Chang, T.-C. Chou, B.-D. Liu, [A portable potentiostat for the bilirubin-specific sensor prepared from molecular imprinting](#), *Biosens. Bioelectron.* 22 (8) (2007) 1694–1699. doi:10.1016/j.bios.2006.07.036.  
URL <http://linkinghub.elsevier.com/retrieve/pii/S0956566306003617>
- [19] S. Labs, C8051F020/1/2/3 (2003).
- [20] G. N. Meloni, [Building a Microcontroller Based Potentiostat: A Inexpensive and Versatile Platform for Teaching Electrochemistry and Instrumentation](#), *J. Chem. Educ.* 93 (7) (2016) 1320–1322. doi:10.1021/acs.jchemed.5b00961.  
URL <http://pubs.acs.org/doi/abs/10.1021/acs.jchemed.5b00961>
- [21] A. A. Rowe, A. J. Bonham, R. J. White, M. P. Zimmer, R. J. Yadgar, T. M. Hobza, J. W. Honea, I. Ben-Yaacov, K. W. Plaxco, [CheapStat: An Open-Source, “Do-It-Yourself” Potentiostat for Analytical and Educational Applications](#), *PLoS One* 6 (9) (2011) e23783. doi:10.1371/journal.pone.0023783.  
URL <http://dx.plos.org/10.1371/journal.pone.0023783>
- [22] Atmel, 8/16-bit XMEGA A4 Microcontroller (2013).
- [23] Texas Instruments, ADS111x Ultra-Small, Low-Power, I2C-Compatible, 860-SPS, 16-Bit ADCs With Internal Reference, Oscillator, and Programmable Comparator (2018).
- [24] T. Instruments, Very Low Noise , 24-Bit Analog-to-Digital Converter D Data Output Rates to 30kSPS ADS1255 (2013).
-

- [25] R. Beach, R. Conlan, M. Godwin, F. Moussy, [Towards a Miniature Implantable In Vivo Telemetry Monitoring System Dynamically Configurable as a Potentiostat or Galvanostat for Two- and Three-Electrode Biosensors](#), *IEEE Trans. Instrum. Meas.* 54 (1) (2005) 61–72. doi:10.1109/TIM.2004.839757.  
URL <http://ieeexplore.ieee.org/document/1381799/>
- [26] Microchip Technology Inc, PIC16F87X (2013).
- [27] E. S. Friedman, M. A. Rosenbaum, A. W. Lee, D. A. Lipson, B. R. Land, L. T. Angenent, [A cost-effective and field-ready potentiostat that poises subsurface electrodes to monitor bacterial respiration](#), *Biosens. Bioelectron.* 32 (1) (2012) 309–313. doi:10.1016/j.bios.2011.12.013.  
URL <http://dx.doi.org/10.1016/j.bios.2011.12.013><http://linkinghub.elsevier.com/retrieve/pii/S0956566311008086>
- [28] Atmel, ATmega164A/164PA/324A/324PA/644A/644PA/1284/1284P (2015).
- [29] C. Mercer, D. Leech, [Cost-Effective Wireless Microcontroller for Internet Connectivity of Open-Source Chemical Devices](#), *J. Chem. Educ.* 95 (7) (2018) 1221–1225. doi:10.1021/acs.jchemed.8b00200.  
URL <http://pubs.acs.org/doi/10.1021/acs.jchemed.8b00200>
